# Supplementary material for: Efficient and Convenient Route for the Synthesis of Some New Antipyrinyl Monoazo Dyes: Application to Polyester Fibers and Biological Evaluation
Source: Hindawi journal article supplement (doi:10.1155/2013/928106), 2012-12-31

## Graphical Abstract

### Efficient and convenient route for the synthesis of some new antipyrinyl monoazo dyes: Application to polyester fibres and biological evaluation

Ahmed A. Fadda and Khaled M. Elattar<sup>\*</sup>

*Department of Chemistry, Faculty of Science, Mansoura University, 35516 Mansoura, Egypt*

*\* Corresponding author. Tel.: +201007129678; fax: 20502246781; E-mail address: khaledelattar2@yahoo.com (K.M. Elattar).*

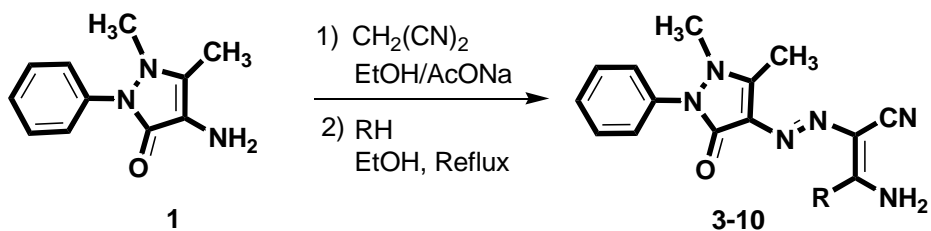

Supplement: f1 [file 928106.f1.pdf]
